# Supplementary material for: 3D chrysanthemum-like g-C3N4/TiO2 as an efficient visible-light-driven Z-scheme hybrid photocatalyst for tetracycline degradation
Source: Royal Society of Chemistry journal article supplement (doi:10.1039/d2cp05073k), 2022-12-28
Supplement: d2cp05073k1.pdf [file d2cp05073k1.pdf]

# 3D Chrysanthemum-like g-C<sub>3</sub>N<sub>4</sub>/TiO<sub>2</sub> as an Efficient Visible-light-driven Z-scheme Hybrid Photocatalyst for Tetracycline Degradation

Jia Yu,\* Chuanxiang Zhang,\* Yulin Yang, Ting Su, Guiyun Yi, Xiuxiu Zhang

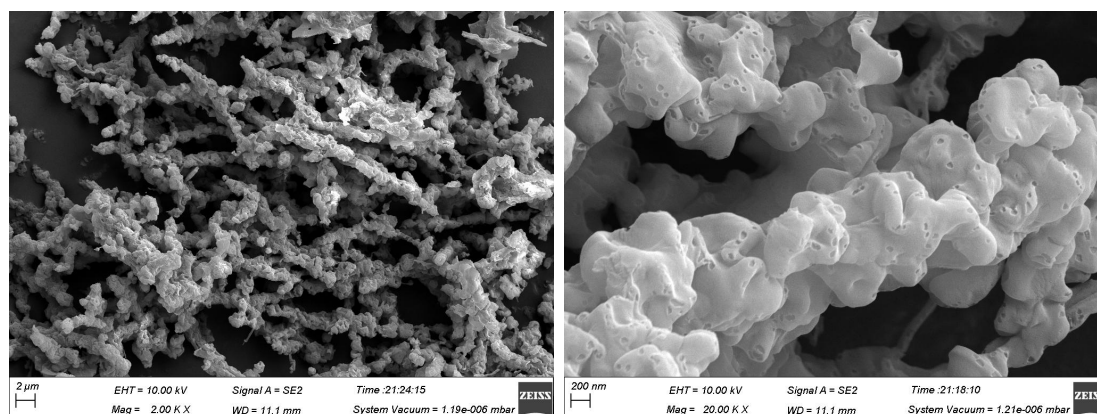

Fig. S1 SEM images of C<sub>3</sub>N<sub>4</sub>.

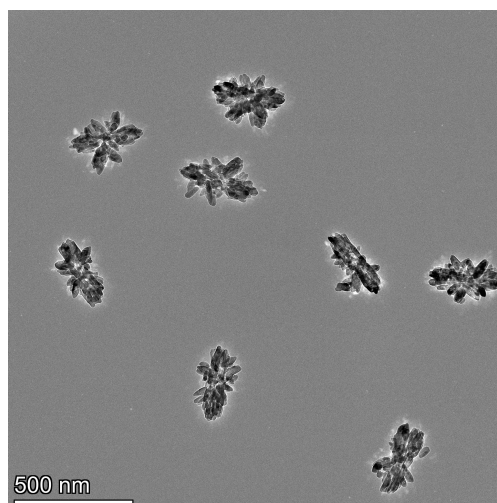

Fig. S2 TEM image of TiO<sub>2</sub>.

Table S1 BET surface area, pore volume and pore size of TiO<sub>2</sub>, g-C<sub>3</sub>N<sub>4</sub> and g-C<sub>3</sub>N<sub>4</sub>/TiO<sub>2</sub>-2.

| Sample                               | TiO <sub>2</sub> | g-C <sub>3</sub> N <sub>4</sub> | g-C <sub>3</sub> N <sub>4</sub> /TiO <sub>2</sub> -2 |
|--------------------------------------|------------------|---------------------------------|------------------------------------------------------|
| S <sub>BET</sub> (m <sup>2</sup> /g) | 134.89           | 49.48                           | 92.20                                                |
| Pore Volume (cm <sup>3</sup> /g)     | 0.157            | 0.032                           | 0.153                                                |
| Pore Diameter Dv(d) (nm)             | 2.191            | 2.193                           | 1.936                                                |

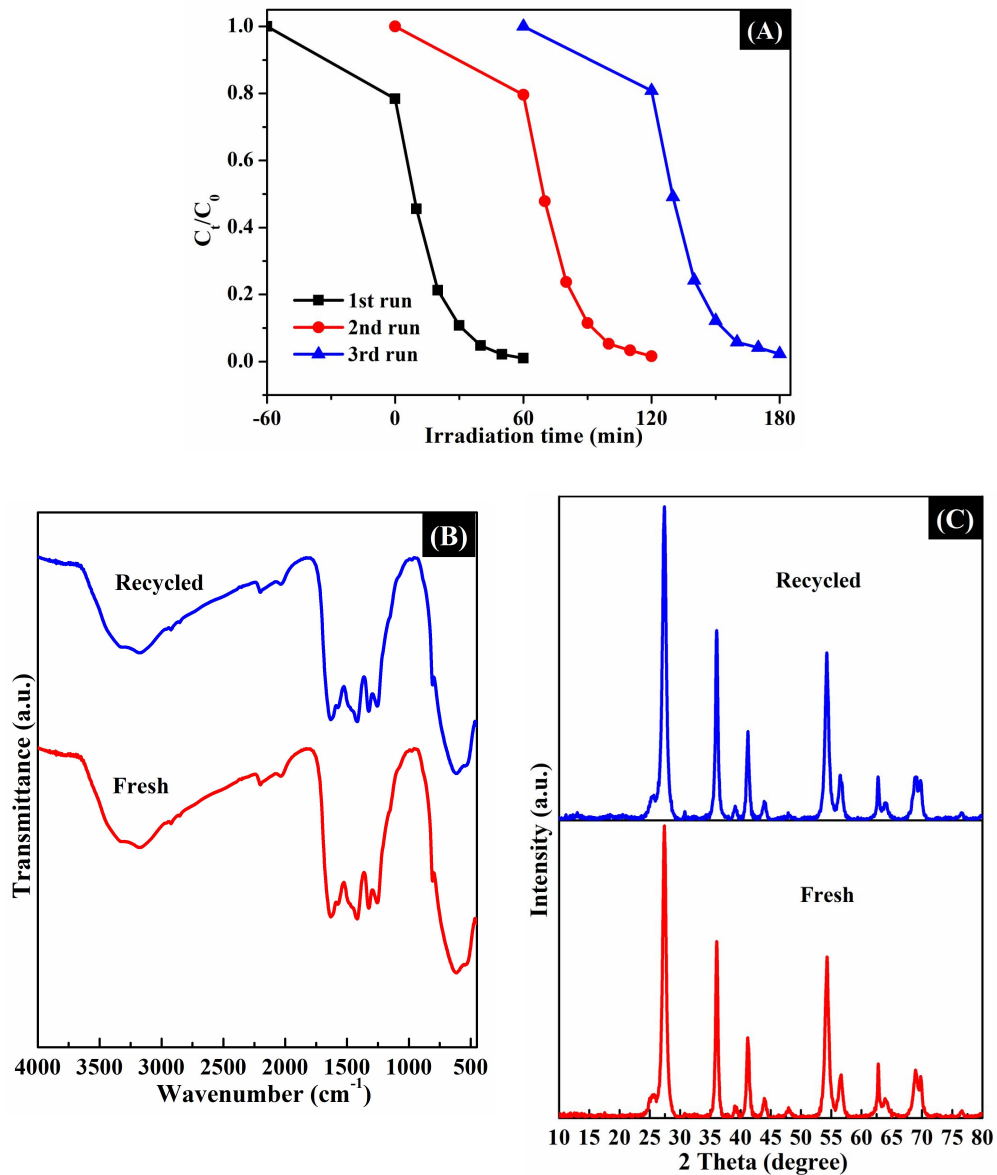

**Fig. S3** (A) Stability test of  $g\text{-C}_3\text{N}_4/\text{TiO}_2\text{-2}$  for degradation of tetracycline, (B) FT-IR spectra and (C) XRD patterns of the  $g\text{-C}_3\text{N}_4/\text{TiO}_2\text{-2}$  before and after 3 times circulating runs.
